# Supplementary material for: Histone Chaperones and Digestive Cancer: A Review of the Literature
Source: MDPI journal article supplement (doi:10.3390/cancers14225584), 2022-11-14
Supplement: s1 [file s1]

**Table S1.** Details of included histone chaperones in human.

| Histone chaperone | Histone preference             | Complex (or complexes)            | Related Tumors       |
|-------------------|--------------------------------|-----------------------------------|----------------------|
| ASF1A             | H3.1–, H3.2–, H3.3–H4          | Multiple                          | HCC, GIC             |
| ASF1B             | H3.1–, H3.2–, H3.3–H4          | Multiple                          | HCC, GC, PC          |
| MCM2              | CENP-A–, H3.1–, H3.2–, H3.3–H4 | MCM2–7 complex                    | HCC, EC, GC, CRC     |
| TONSL             | H3–H4                          | MMS22L–TONSL complex              | GC                   |
| RBAP46            | H3–H4                          | HAT, HDAC, NuRF, NuRD, PRC2       | NR                   |
| sNASP             | H3.1–, H3.2–, H3.3–H4, H1      | HAT                               | HCC                  |
| IPO4              | H3.1–, H3.2–, H3.3–H4          | Nuclear import receptor           | GC                   |
| SPT2              | H3–H4                          | ND                                | CRC                  |
| SPT6              | H3–H4                          | ND                                | CRC                  |
| ANP32E            | H2A.Z–H2B                      | P400–TIP60                        | GC, PC               |
| HJURP             | CENP-A–H4 (Cse4–H4)            | Centromere assembly               | HCC, PC, CRC         |
| SET               | H3–H4                          | INHAT, Vps75–Rtt109               | NR                   |
| NAP1L1            | H2A–, H2A.Z–H2B, H3–H4, H1     | Nuclear import importin 9, Kap114 | HCC, CRC             |
| NPM1              | H3–H4, CENP-A–H4, H1           | SWAP                              | HCC, GC, PC, CRC, EC |
| Nucleolin         | H2A–H2B, H1                    | SWAP                              | HCC, GC, PC, CRC, EC |
| CHAF1A            | H3.1–H4                        | CAF1                              | HCC, GC              |
| CHAF1B            | H3.1–H4                        | CAF1                              | HCC                  |

| Histone chaperone | Histone preference    | Complex (or complexes)           | Related Tumors |
|-------------------|-----------------------|----------------------------------|----------------|
| RBAP48            | H3.1–, H3.2–, H3.3–H4 | CAF1, HDAC, NuRF, NuRD, and PRC2 | GC             |
| HIRA              | ND                    | HIRA/HIR                         | NR             |
| UBN1              | H3.3–H4               | HIRA/HIR                         | NR             |
| CABIN1            | ND                    | HIRA/HIR                         | NR             |
| SPT16             | H2A–H2B, H3–H4        | FACT                             | HCC            |
| SSRP1             | H2A–H2B, H3–H4        | FACT                             | HCC, GC, CRC   |
| DAXX              | H3.3–H4               | DAXX–ATRX                        | GC, CRC        |
| ATRX              | ND                    | DAXX–ATRX                        | CRC, PC        |
| VPS72             | H2A.Z–H2B             | SRCAP/SWR-C, P400-TIP60          | HCC            |

ANP32E: Acidic-leucine-rich nuclear phosphoprotein 32E; ASF1A: Anti-Silencing Function 1A; ASF1B: Anti-Silencing Function 1B; ATRX: Alpha-thalassaemia/mental retardation syndrome X-linked; CABIN: Calcineurin-binding protein cabin-1; CHAF1A: Chromatin Assembly Factor 1 Subunit A; CHAF1B: Chromatin Assembly Factor 1 Subunit B; CRC: colorectal cancer; DAXX: Death domain-associated protein 6; EC: esophageal cancer; GC: gastric cancer; HATs: Histone acetyltransferases; HCC: hepatocellular carcinoma; HDAC: Histone deacetylase; HIRA: Histone regulation A; HJURP: Holliday Junction Recognition Protein; hTERT: Human telomerase reverse transcriptase; INHAT: Inhibitor of histone acetyltransferases; IPO4: Importin 4; MCM2: Minichromosome maintenance protein 2; MMS22L: Methyl Methanesulfonate-Sensitivity Protein 22-Like; NAP1L1: Nucleosome Assembly Protein 1 Like 1; ND, not defined; NPM1: Nucleophosmin 1; NR: not reported; NuRF: Nucleosome Remodeling Factor; PC: pancreatic cancer; RBAP46: Retinoblastoma associated protein 46; RBAP48: Retinoblastoma associated protein 48; SET: Patient SE translocation; PRC2: Polycomb repressive complex 2; sNASP: Somatic nuclear autoantigenic sperm protein; SPT2: Suppressor of Ty 2; SPT16: Suppressor Of Ty 16; SSRP1: Structure Specific Recognition Protein 1. UBN1: Ubinuclein 1; VPS72: protein sorting 72 homologue; TONSL: Tonsuku Like.

**Table S2.** Included literature on selected histone chaperones in digestive cancer.

| ID | Histone chaperone | First author | Year | Tumor | Reference number |
|----|-------------------|--------------|------|-------|------------------|
| 1  | ANP32E            | Zhu          | 2022 | GC    | [1]              |
| 2  |                   | Zhang        | 2020 | PDAC  | [2]              |
| 3  |                   | Ma           | 2021 | PDAC  | [3]              |
| 4  | ASF1A             | Liang        | 2017 | CRC   | [4]              |
| 5  |                   | Qiu          | 2019 | CRC   | [5]              |
| 6  |                   | Wu           | 2019 | HCC   | [6]              |
| 7  |                   | Chen         | 2022 | GC    | [7]              |
| 8  |                   | Zhang        | 2022 | HCC   | [8]              |
| 9  |                   | Ouyang       | 2021 | HCC   | [9]              |
| 10 |                   | Zhan         | 2021 | HCC   | [10]             |
| 11 |                   | Kim          | 2022 | PDAC  | [11]             |
| 12 |                   | Wang         | 2022 | PDAC  | [12]             |
| 13 | ATRX              | Young        | 2019 | PDAC  | [13]             |
| 14 |                   | Li           | 2018 | CRC   | [14]             |
| 15 | DAXX              | Tzeng        | 2006 | CRC   | [15]             |
| 16 |                   | Chen         | 2019 | CRC   | [16]             |
| 17 |                   | Liu          | 2020 | CRC   | [17]             |
| 18 |                   | Huang        | 2022 | CRC   | [18]             |
| 19 |                   | Ko           | 2018 | EC    | [19]             |
| 20 |                   | Chen         | 2020 | GC    | [20]             |
| 21 |                   | Wu           | 2020 | GC    | [21]             |
| 22 |                   | Xu           | 2017 | GC    | [22]             |
| 23 | CHAF1A            | Zheng        | 2018 | GC    | [23]             |
| 24 |                   | Wang         | 2019 | GC    | [24]             |
| 25 |                   | Xu           | 2016 | HCC   | [25]             |
| 26 | CHAF1B            | Peng         | 2018 | HCC   | [26]             |
| 27 | HJURP             | Kang         | 2020 | CRC   | [27]             |
| 28 |                   | Chen         | 2019 | HCC   | [28]             |
| 29 |                   | Hu           | 2017 | HCC   | [29]             |
| 30 |                   | Yi           | 2021 | HCC   | [30]             |
| 31 |                   | Chen         | 2018 | HCC   | [31]             |
| 32 |                   | Wang         | 2020 | PDAC  | [32]             |
| 33 | IPO4              | Xu           | 2019 | GC    | [33]             |
| 34 | MCM2              | Wang         | 2020 | CRC   | [34]             |
| 35 |                   | Giaginis     | 2009 | CRC   | [35]             |
| 36 |                   | Hanna-Morris | 2009 | CRC   | [36]             |
| 37 |                   | Kato         | 2003 | EC    | [37]             |

| ID | Histone chaperone | First author | Year | Tumor | Reference number |
|----|-------------------|--------------|------|-------|------------------|
| 38 |                   | Huang        | 2011 | EC    | [38]             |
| 39 |                   | Yang         | 2012 | GC    | [39]             |
| 40 |                   | Giaginis     | 2011 | GC    | [40]             |
| 41 |                   | Liu          | 2013 | GC    | [41]             |
| 42 |                   | Tokuyasu     | 2008 | GC    | [42]             |
| 43 |                   | Tang         | 2022 | HCC   | [43]             |
| 44 |                   | Ahmed        | 2019 | HCC   | [44]             |
| 45 | NAP1L1            | Queiroz      | 2020 | CRC   | [45]             |
| 46 |                   | Aydin        | 2020 | CRC   | [46]             |
| 47 |                   | Huang        | 2018 | HCC   | [47]             |
| 48 |                   | Chen         | 2018 | HCC   | [48]             |
| 49 |                   | Zhang        | 2021 | HCC   | [49]             |
| 50 |                   | Le           | 2019 | HCC   | [50]             |
|    |                   | Schimmack    | 2014 | PDAC  | [51]             |
| 51 | NPM1              | Wang         | 2022 | CRC   | [52]             |
| 52 |                   | Wong         | 2013 | CRC   | [53]             |
| 53 |                   | Yu           | 2021 | CRC   | [54]             |
| 54 |                   | Grbčić       | 2021 | CRC   | [55]             |
| 55 |                   | Liu          | 2012 | CRC   | [56]             |
| 56 |                   | Nozawa       | 1996 | CRC   | [57]             |
| 57 |                   | Yang         | 2014 | CRC   | [58]             |
| 58 |                   | Tang         | 2018 | CRC   | [59]             |
| 59 |                   | Liu          | 2022 | EC    | [60]             |
| 60 |                   | Leal         | 2014 | GC    | [61]             |
| 61 |                   | Zhou         | 2016 | GC    | [62]             |
| 62 |                   | Zhou         | 2013 | GC    | [63]             |
| 63 |                   | Guo          | 2022 | GC    | [64]             |
| 64 |                   | Li           | 2014 | GC    | [65]             |
| 65 |                   | Lakshmi Ch   | 2021 | GC    | [66]             |
| 66 |                   | Yun          | 2007 | HCC   | [67]             |
| 67 |                   | Xu           | 2014 | HCC   | [68]             |
| 68 |                   | Lo           | 2013 | HCC   | [69]             |
| 69 |                   | Zhang        | 2022 | HCC   | [70]             |
| 70 |                   | Liu          | 2012 | HCC   | [71]             |
| 71 |                   | Li           | 2017 | HCC   | [72]             |
| 72 |                   | Ching        | 2015 | HCC   | [73]             |
| 73 |                   | Zhu          | 2015 | PDAC  | [74]             |
| 74 |                   | Hamilton     | 2014 | PDAC  | [75]             |
| 75 | Nucleolin         | Wu           | 2014 | CRC   | [76]             |
| 76 |                   | Reyes-Reyes  | 2008 | CRC   | [77]             |

| ID  | Histone chaperone | First author    | Year | Tumor | Reference number |
|-----|-------------------|-----------------|------|-------|------------------|
| 77  |                   | Wu              | 2020 | CRC   | [78]             |
| 78  |                   | Qi              | 2015 | ESCC  | [79]             |
| 79  |                   | Qiu             | 2013 | GC    | [80]             |
| 80  |                   | Devanand        | 2018 | GC    | [81]             |
| 81  |                   | Qiu             | 2015 | HCC   | [82]             |
| 82  |                   | Guo             | 2014 | HCC   | [83]             |
| 83  |                   | Chen            | 2015 | HCC   | [84]             |
| 84  |                   | Burbano De Lara | 2021 | HCC   | [85]             |
| 85  |                   | Gilles          | 2016 | PDAC  | [86]             |
| 86  |                   | Peng            | 2010 | PDAC  | [87]             |
| 87  |                   | Xu              | 2019 | PDAC  | [88]             |
| 88  | RBAP48            | Jin             | 2018 | GC    | [89]             |
| 89  | sNASP             | Yu              | 2017 | GC    | [90]             |
| 90  |                   | Kang            | 2018 | HCC   | [91]             |
| 91  | SPT2              | Yin             | 2022 | CRC   | [92]             |
| 92  | SPT6              | Diao            | 2021 | CRC   | [93]             |
| 93  | SPT16/SSRP1       | Shen            | 2020 | HCC   | [94]             |
| 94  | SSRP1             | Song            | 2020 | CRC   | [95]             |
| 95  |                   | Wu              | 2019 | CRC   | [96]             |
| 96  |                   | Wang            | 2019 | CRC   | [97]             |
| 97  |                   | Huang           | 2019 | CRC   | [98]             |
| 98  |                   | Jin             | 2022 | GC    | [99]             |
| 99  |                   | Ding            | 2016 | HCC   | [100]            |
| 100 |                   | Min             | 2021 | HCC   | [101]            |
| 101 |                   | Zheng           | 2020 | HCC   | [102]            |
| 102 | TONSL             | Wang            | 2019 | GC    | [103]            |
| 103 | VPS72             | Chen            | 2022 | HCC   | [104]            |

**Abbreviations:** ANP32E: Acidic Nuclear Phosphoprotein 32 Family Member E; ASF1A: Anti-Silencing Function 1A; ASF1B: Anti-Silencing Function 1B; ATRX: ATRX Chromatin Remodeler; CHAF1A: Chromatin Assembly Factor 1 Subunit A; CHAF1B: Chromatin Assembly Factor 1 Subunit B; DAXX: Death Domain Associated Protein; HJURP: Holliday Junction Recognition Protein; HIRA; IPO4: Importin 4; MCM2: Minichromosome Maintenance Complex Component 2; NAP1L1: Nucleosome Assembly Protein 1 Like 1; NPM1: Nucleophosmin 1; NR: not reported; NS: not significant; sNASP: Nuclear Autoantigenic Sperm Protein; SPT2: Suppressor Of Ty 2; SPT6: Suppressor Of Ty 6; SPT16: Suppressor Of Ty 16; SSRP1: Structure Specific Recognition Protein 1; TONSL: Ton-soku Like.

**Table S3.** Clinical events of selected histone chaperones in digestive cancer.

| Gene   | Tumor | Role       | Expression                   | Correlation with OS | Correlation with DFS | Reference number |
|--------|-------|------------|------------------------------|---------------------|----------------------|------------------|
| ASF1A  | HCC   | promoter   | High                         | Negative            | Negative             | [6]              |
|        | CRC   | promoter   | High                         | Negative            | Negative             | [4]              |
| ASF1B  | HCC   | promoter   | NR                           | Negative            | Negative             | [8]              |
|        | HCC   | promoter   | High                         | NR                  | NR                   | [9]              |
|        | GC    | promoter   | High                         | Negative            | NR                   | [7]              |
| SPT16  | HCC   | promoter   | High                         | Negative            | Negative             | [105]            |
| SSRP1  | HCC   | promoter   | High                         | Negative            | Negative             | [105]            |
|        | HCC   | promoter   | High                         | Negative            | Negative             | [100]            |
|        | GC    | promoter   | High (RNA)                   | NR                  | NR                   | [99]             |
|        | CRC   | promoter   | High                         | NR                  | NR                   | [95]             |
|        | CRC   | promoter   | High                         | Negative            | Negative             | [96]             |
| HJURP  | HCC   | promoter   | High                         | Negative            | NR                   | [31]             |
|        | HCC   | promoter   | High                         | NR                  | NR                   | [106]            |
|        | HCC   | promoter   | High                         | Negative            | NR                   | [29]             |
|        | HCC   | promoter   | High                         | Negative            | NR                   | [107]            |
|        | PDAC  | promoter   | High                         | NR                  | NR                   | [32]             |
|        | CRC   | promoter   | High                         | Negative            | NR                   | [27]             |
| NPM1   | HCC   | promoter   | High                         | NR                  | NR                   | [108]            |
|        | HCC   | NR         | High                         | NR                  | NR                   | [68]             |
|        | HCC   | promoter   | High                         | Negative            | NR                   | [109]            |
|        | GC    | NR         | Low                          | NR                  | NR                   | [110]            |
|        | GC    | promoter   | High                         | Negative            | Negative             | [62]             |
|        | GC    | promoter   | High                         | Negative            | Negative             | [63]             |
|        | GC    | suppressor | Low                          | Positive            | Positive             | [64]             |
|        | GC    | promoter   | High                         | Negative            | Negative             | [65]             |
|        | PDAC  | promoter   | High                         | Negative            | NR                   | [74]             |
|        | PDAC  | promoter   | High (NPM <sup>S48ph</sup> ) | NR                  | NR                   | [75]             |
|        | CRC   | promoter   | High                         | NR                  | NR                   | [53]             |
|        | CRC   | promoter   | High                         | Negative            | NR                   | [54]             |
|        | CRC   | promoter   | High                         | NR                  | NR                   | [55]             |
|        | CRC   | promoter   | High                         | Negative            | NR                   | [56]             |
|        | CRC   | NR         | High                         | NR                  | NR                   | [57]             |
|        | CRC   | promoter   | High                         | Negative            | Negative             | [58]             |
| NAP1L1 | HCC   | promoter   | High                         | Negative            | NR                   | [49]             |
|        | HCC   | promoter   | High                         | Negative            | NR                   | [50]             |
|        | CRC   | suppressor | Low                          | Positive            | NR                   | [45]             |

| Gene      | Tumor | Role              | Expression        | Correlation with OS | Correlation with DFS | Reference number |
|-----------|-------|-------------------|-------------------|---------------------|----------------------|------------------|
|           | CRC   | NR                | High in serum     | NR                  | NR                   | [46]             |
| CHAF1A    | HCC   | promoter          | High              | Negative            | Negative             | [25]             |
|           | GC    | promoter          | High              | NR                  | NR                   | [23]             |
|           | GC    | promoter          | NR                | Negative            | Negative             | [24]             |
| Nucleolin | HCC   | promoter          | High              | Negative            | NR                   | [82]             |
|           | HCC   | promoter          | High              | Negative            | Negative             | [111]            |
|           | HCC   | promoter          | High              | Negative            | NR                   | [84]             |
|           | GC    | dependent on site | High              | Dependent on site   | NR                   | [80]             |
|           | GC    | promoter          | High              | Negative            | NR                   | [81]             |
|           | PDAC  | promoter          | High              | Negative            | NR                   | [86]             |
|           | PDAC  | dependent on site | High in nucleolus | Positive            | NR                   | [87]             |
|           | CRC   | promoter          | NS                | NR                  | NR                   | [76]             |
|           | ESCC  | dependent on site | High              | Dependent on site   | NR                   | [79]             |
| DAXX      | EC    | promoter          | High              | Negative            | NR                   | [19]             |
|           | GC    | promoter          | High in nucleolus | Negative            | Negative             | [20]             |
|           | GC    | suppressor        | Low               | NR                  | NR                   | [21]             |
|           | GC    | promoter          | High in nucleolus | Negative            | Negative             | [22]             |
|           | CRC   | NR                | Low               | NR                  | NR                   | [15]             |
|           | CRC   | suppressor        | Low               | NR                  | NR                   | [16]             |
|           | CRC   | suppressor        | Low (RNA)         | NR                  | NR                   | [17]             |
|           | CRC   | promoter          | High              | NR                  | NR                   | [18]             |
| ATRX      | CRC   | promoter          | High (RNA)        | NR                  | NR                   | [14]             |
| MCM2      | HCC   | promoter          | High              | Negative            | NR                   | [43]             |
|           | HCC   | promoter          | High (RNA)        | NR                  | NR                   | [44]             |
|           | EC    | promoter          | NR                | Negative            | NR                   | [37]             |
|           | EC    | NR                | High              | NR                  | NR                   | [38]             |
|           | GC    | promoter          | High              | Negative            | Negative             | [39]             |
|           | GC    | NR                | High              | NS                  | NR                   | [40]             |
|           | GC    | NR                | High              | Negative            | Negative             | [41]             |
|           | GC    | NR                | High              | Negative            | NR                   | [42]             |
|           | CRC   | NR                | High              | NR                  | NR                   | [35]             |

| Gene   | Tumor | Role     | Expression | Correlation with OS | Correlation with DFS | Reference number |
|--------|-------|----------|------------|---------------------|----------------------|------------------|
|        | CRC   | NR       | High       | NR                  | NR                   | [36]             |
| sNASP  | HCC   | promoter | High       | NR                  | NR                   | [91]             |
| IPO4   | GC    | promoter | High       | NR                  | NR                   | [33]             |
| SPT2   | CRC   | promoter | High       | Negative            | NR                   | [92]             |
| SPT6   | CRC   | promoter | High       | NR                  | NR                   | [93]             |
| ANP32E | PDAC  | promoter | High       | NR                  | NR                   | [3]              |
|        | GC    | promoter | High (RNA) | NR                  | NR                   | [1]              |

Abbreviations: ANP32E: Acidic Nuclear Phosphoprotein 32 Family Member E; ASF1A: Anti-Silencing Function 1A; ASF1B: Anti-Silencing Function 1B; ATRX: ATRX Chromatin Remodeler; CHAF1A: Chromatin Assembly Factor 1 Subunit A; CHAF1B: Chromatin Assembly Factor 1 Subunit B; DAXX: Death Domain Associated Protein; HJURP: Holliday Junction Recognition Protein; HIRA: IPO4: Importin 4; MCM2: Minichromosome Maintenance Complex Component 2; NAP1L1: Nucleosome Assembly Protein 1 Like 1; NPM1: Nucleophosmin 1; NR: not re-ported; NS: not significant; sNASP: Nuclear Autoantigenic Sperm Protein; SPT2: Suppressor Of Ty 2; SPT6: Suppressor Of Ty 6; SPT16: Suppressor Of Ty 16; SSRP1: Structure Specific Recognition Protein 1; TONSL: Tonsoku Like.

## References

1. Zhu, X.; Zou, Y.; Wu, T.; Ni, J.; Tan, Q.; Wang, Q.; Zhang, M. ANP32E contributes to gastric cancer progression via NUF2 upregulation. *Mol Med Rep* **2022**, *26*, doi:10.3892/mmr.2022.12791.
2. Zhang, J.; Lan, Z.; Qiu, G.; Ren, H.; Zhao, Y.; Gu, Z.; Li, Z.; Feng, L.; He, J.; Wang, C. Over-expression of ANP32E is associated with poor prognosis of pancreatic cancer and promotes cell proliferation and migration through regulating  $\beta$ -catenin. *BMC Cancer* **2020**, *20*, 1065, doi:10.1186/s12885-020-07556-z.
3. Ma, Y.S.; Yang, X.L.; Liu, Y.S.; Ding, H.; Wu, J.J.; Shi, Y.; Jia, C.Y.; Lu, G.X.; Zhang, D.D.; Wang, H.M.; et al. Long non-coding RNA NORAD promotes pancreatic cancer stem cell proliferation and self-renewal by blocking microRNA-202-5p-mediated ANP32E inhibition. *J Transl Med* **2021**, *19*, 400, doi:10.1186/s12967-021-03052-5.
4. Liang, X.; Yuan, X.; Yu, J.; Wu, Y.; Li, K.; Sun, C.; Li, S.; Shen, L.; Kong, F.; Jia, J.; et al. Histone Chaperone ASF1A Predicts Poor Outcomes for Patients With Gastrointestinal Cancer and Drives Cancer Progression by Stimulating Transcription of  $\beta$ -Catenin Target Genes. *EBioMedicine* **2017**, *21*, 104–116, doi:10.1016/j.ebiom.2017.06.007.
5. Qiu, F.; Wang, Y.; Chu, X.; Wang, J. ASF1A regulates H4(Y72) phosphorylation and promotes autophagy in colon cancer cells via a kinase activity. *Artif Cells Nanomed Biotechnol* **2019**, *47*, 2754–2763, doi:10.1080/21691401.2019.1617725.
6. Wu, Y.; Li, X.; Yu, J.; Björkholm, M.; Xu, D. ASF1a inhibition induces p53-dependent growth arrest and senescence of cancer cells. *Cell Death Dis* **2019**, *10*, 76, doi:10.1038/s41419-019-1357-z.
7. Chen, C.; Bao, H.; Lin, W.; Chen, X.; Huang, Y.; Wang, H.; Yang, Y.; Liu, J.; Lv, X.; Teng, L. ASF1b is a novel prognostic predictor associated with cell cycle signaling pathway in gastric cancer. *J Cancer* **2022**, *13*, 1985–2000, doi:10.7150/jca.69544.
8. Zhang, S.; Xu, L.; Feng, J.; Tan, D.; Zhu, Y.; Hou, J.; Li, W.; Lv, K.; Wang, W.; Jiang, L.; et al. ASF1B is a Promising Prognostic Biomarker and Correlates With Immunotherapy Efficacy in Hepatocellular Carcinoma. *Front Genet* **2022**, *13*, 842351, doi:10.3389/fgene.2022.842351.
9. Ouyang, X.; Lv, L.; Zhao, Y.; Zhang, F.; Hu, Q.; Li, Z.; Zhu, D.; Li, L. ASF1B Serves as a Potential Therapeutic



- Target by Influencing Cell Cycle and Proliferation in Hepatocellular Carcinoma. *Front Oncol* **2021**, *11*, 801506, doi:10.3389/fonc.2021.801506.
10. Zhan, T.; Gao, X.; Wang, G.; Li, F.; Shen, J.; Lu, C.; Xu, L.; Li, Y.; Zhang, J. Construction of Novel lncRNA-miRNA-mRNA Network Associated With Recurrence and Identification of Immune-Related Potential Regulatory Axis in Hepatocellular Carcinoma. *Front Oncol* **2021**, *11*, 626663, doi:10.3389/fonc.2021.626663.
  11. Kim, J.H.; Youn, Y.; Lee, J.C.; Kim, J.; Ryu, J.K.; Hwang, J.H. Downregulation of ASF1B inhibits tumor progression and enhances efficacy of cisplatin in pancreatic cancer. *Cancer Biomark* **2022**, *34*, 647-659, doi:10.3233/cbm-210490.
  12. Wang, K.; Hao, Z.; Fu, X.; Li, W.; Jiao, A.; Hua, X. Involvement of elevated ASF1B in the poor prognosis and tumorigenesis in pancreatic cancer. *Mol Cell Biochem* **2022**, *477*, 1945-1957, doi:10.1007/s11010-022-04404-5.
  13. Young, C.C.; Baker, R.M.; Howlett, C.J.; Hryciw, T.; Herman, J.E.; Higgs, D.; Gibbons, R.; Crawford, H.; Brown, A.; Pin, C.L. The Loss of ATRX Increases Susceptibility to Pancreatic Injury and Oncogenic KRAS in Female But Not Male Mice. *Cell Mol Gastroenterol Hepatol* **2019**, *7*, 93-113, doi:10.1016/j.jcmgh.2018.09.004.
  14. Li, X.; Oh, S.; Song, H.; Shin, S.; Zhang, B.; Freeman, W.M.; Janknecht, R. A potential common role of the Jumonji C domain-containing 1A histone demethylase and chromatin remodeler ATRX in promoting colon cancer. *Oncol Lett* **2018**, *16*, 6652-6662, doi:10.3892/ol.2018.9487.
  15. Tzeng, S.L.; Cheng, Y.W.; Li, C.H.; Lin, Y.S.; Hsu, H.C.; Kang, J.J. Physiological and functional interactions between Tcf4 and Daxx in colon cancer cells. *J Biol Chem* **2006**, *281*, 15405-15411, doi:10.1074/jbc.M601807200.
  16. Chen, Y.C.; Lee, T.H.; Tzeng, S.L. Reduced DAXX Expression Is Associated with Reduced CD24 Expression in Colorectal Cancer. *Cells* **2019**, *8*, 1242, doi:10.3390/cells8101242.
  17. Liu, Y.; Guo, F.; Zhu, X.; Guo, W.; Fu, T.; Wang, W. Death Domain-Associated Protein Promotes Colon Cancer Metastasis through Direct Interaction with ZEB1. *J Cancer* **2020**, *11*, 750-758, doi:10.7150/jca.34233.
  18. Huang, Y.S.; Wu, C.C.; Chang, C.C.; Huang, S.F.; Kuo, H.Y.; Shih, H.M. Reciprocal regulation of Daxx and PIK3CA promotes colorectal cancer cell growth. *Cell Mol Life Sci* **2022**, *79*, 367, doi:10.1007/s00018-022-04399-8.
  19. Ko, T.Y.; Kim, J.I.; Park, E.S.; Mun, J.M.; Park, S.D. The Clinical Implications of Death Domain-Associated Protein (DAXX) Expression. *Korean J Thorac Cardiovasc Surg* **2018**, *51*, 187-194, doi:10.5090/kjtcs.2018.51.3.187.
  20. Chen, C.; Sun, X.; Xie, W.; Chen, S.; Hu, Y.; Xing, D.; Xu, J.; Chen, X.; Zhao, Z.; Han, Z.; et al. Opposing biological functions of the cytoplasm and nucleus DAXX modified by SUMO-2/3 in gastric cancer. *Cell Death Dis* **2020**, *11*, 514, doi:10.1038/s41419-020-2718-3.
  21. Wu, C.; Ding, H.; Wang, S.; Li, Y.; Liu, S.B.; Wang, X.; Zheng, J.; Xue, T.; Amin, H.M.; Song, Y.H.; et al. DAXX inhibits cancer stemness and epithelial-mesenchymal transition in gastric cancer. *Br J Cancer* **2020**, *122*, 1477-1485, doi:10.1038/s41416-020-0800-3.
  22. Xu, J.F.; Zhao, Z.G.; Ye, L.L.; Zhuge, W.; Han, Z.; Zhang, T.M.; Ye, S.S.; Chen, W.J.; Zhu, S.; Shi, L.; et al. Prognostic significance of Daxx NCR (Nuclear/Cytoplasmic Ratio) in gastric cancer. *Cancer Med* **2017**, *6*, 2063-2075, doi:10.1002/cam4.1144.
  23. Zheng, L.; Liang, X.; Li, S.; Li, T.; Shang, W.; Ma, L.; Jia, X.; Shao, W.; Sun, P.; Chen, C.; et al. CHAF1A interacts with TCF4 to promote gastric carcinogenesis via upregulation of c-MYC and CCND1 expression. *EBioMedicine* **2018**, *38*, 69-78, doi:10.1016/j.ebiom.2018.11.009.
  24. Wang, D.; Li, X.; Shen, B.; Chen, X.; Shu, Y. Histone chaperone CHAF1A impacts the outcome of fluoropyrimidines-based adjuvant therapy in gastric cancer by regulating the expression of thymidylate synthetase. *Gene* **2019**, *716*, 144034, doi:10.1016/j.gene.2019.144034.
  25. Xu, M.; Jia, Y.; Liu, Z.; Ding, L.; Tian, R.; Gu, H.; Wang, Y.; Zhang, H.; Tu, K.; Liu, Q. Chromatin assembly factor

- 1, subunit A (P150) facilitates cell proliferation in human hepatocellular carcinoma. *Onco Targets Ther* **2016**, *9*, 4023–4035, doi:10.2147/ott.S107050.
26. Peng, X.; Fu, H.; Yin, J.; Zhao, Q. CHAF1B knockdown blocks migration in a hepatocellular carcinoma model. *Oncol Rep* **2018**, *40*, 405–413, doi:10.3892/or.2018.6437.
27. Kang, D.H.; Woo, J.; Kim, H.; Kim, S.Y.; Ji, S.; Jaygal, G.; Ahn, T.S.; Kim, H.J.; Kwak, H.J.; Kim, C.J.; et al. Prognostic Relevance of HJURP Expression in Patients with Surgically Resected Colorectal Cancer. *Int J Mol Sci* **2020**, *21*, 7928, doi:10.3390/ijms21217928.
28. Chen, T.; Zhou, Y.; Zhou, W.; Huang, H.; Yin, S.; Xie, H.; Zhou, L.; Zheng, S. HJURP Promotes Epithelial-to-Mesenchymal Transition via Upregulating SPHK1 in Hepatocellular Carcinoma. *International journal of biological sciences* **2019**, *15*(6), 1139–1147, doi:https://dx.doi.org/10.7150/ijbs.30904.
29. Hu, B.; Wang, Q.; Wang, Y.; Chen, J.; Li, P.; Han, M. Holliday junction-recognizing protein promotes cell proliferation and correlates with unfavorable clinical outcome of hepatocellular carcinoma. *Onco Targets Ther* **2017**, *10*, 2601–2607, doi:10.2147/ott.S127738.
30. Yi, Q.; Liao, X.; Han, C.; Zheng, L.; Li, H.; Yu, Q.; Yan, X.; Chen, X.; Zhu, H.; Zhao, B.; et al. Hypomethylation-driven overexpression of HJURP promotes progression of hepatocellular carcinoma and is associated with poor prognosis. *Biochemical and Biophysical Research Communications* **2021**, *566*, 67–74, doi:https://dx.doi.org/10.1016/j.bbrc.2021.05.102.
31. Chen, T.; Huang, H.; Zhou, Y.; Geng, L.; Shen, T.; Yin, S.; Zhou, L.; Zheng, S. HJURP promotes hepatocellular carcinoma proliferation by destabilizing p21 via the MAPK/ERK1/2 and AKT/GSK3 $\beta$  signaling pathways. *J Exp Clin Cancer Res* **2018**, *37*, 193, doi:10.1186/s13046-018-0866-4.
32. Wang, C.J.; Li, X.; Shi, P.; Ding, H.Y.; Liu, Y.P.; Li, T.; Lin, P.P.; Wang, Y.S.; Zhang, G.Q.; Cao, Y. Holliday junction recognition protein promotes pancreatic cancer growth and metastasis via modulation of the MDM2/p53 signaling. *Cell Death Dis* **2020**, *11*, 386, doi:10.1038/s41419-020-2595-9.
33. Xu, X.; Zhang, X.; Xing, H.; Liu, Z.; Jia, J.; Jin, C.; Zhang, Y. Importin-4 functions as a driving force in human primary gastric cancer. *J Cell Biochem* **2019**, *120*, 12638–12646, doi:10.1002/jcb.28530.
34. Wang, Y.; Chen, H.; Zhang, J.; Cheng, A.S.L.; Yu, J.; To, K.F.; Kang, W. MCM family in gastrointestinal cancer and other malignancies: From functional characterization to clinical implication. *Biochim Biophys Acta Rev Cancer* **2020**, *1874*, 188415, doi:10.1016/j.bbcan.2020.188415.
35. Giaginis, C.; Georgiadou, M.; Dimakopoulou, K.; Tsourouflis, G.; Gatzidou, E.; Kouraklis, G.; Theocharis, S. Clinical significance of MCM-2 and MCM-5 expression in colon cancer: association with clinicopathological parameters and tumor proliferative capacity. *Dig Dis Sci* **2009**, *54*, 282–291, doi:10.1007/s10620-008-0305-z.
36. Hanna-Morris, A.; Badvie, S.; Cohen, P.; McCullough, T.; Andreyev, H.J.; Allen-Mersh, T.G. Minichromosome maintenance protein 2 (MCM2) is a stronger discriminator of increased proliferation in mucosa adjacent to colorectal cancer than Ki-67. *J Clin Pathol* **2009**, *62*, 325–330, doi:10.1136/jcp.2007.054643.
37. Kato, H.; Miyazaki, T.; Fukai, Y.; Nakajima, M.; Sohda, M.; Takita, J.; Masuda, N.; Fukuchi, M.; Manda, R.; Ojima, H.; et al. A new proliferation marker, minichromosome maintenance protein 2, is associated with tumor aggressiveness in esophageal squamous cell carcinoma. *J Surg Oncol* **2003**, *84*, 24–30, doi:10.1002/jso.10287.
38. Huang, B.; Hu, B.; Su, M.; Tian, D.; Guo, Y.; Lian, S.; Liu, Z.; Wu, X.; Li, Q.; Zheng, R.; et al. Potential role of minichromosome maintenance protein 2 as a screening biomarker in esophageal cancer high-risk population in China. *Hum Pathol* **2011**, *42*, 808–816, doi:10.1016/j.humpath.2010.04.022.
39. Yang, C.; Wen, Y.; Li, H.; Zhang, D.; Zhang, N.; Shi, X.; Jiang, B.; Ma, X.; Yang, P.; Tang, H.; et al. Overexpression of minichromosome maintenance 2 predicts poor prognosis in patients with gastric cancer. *Oncol Rep* **2012**, *27*,

- 135-142, doi:10.3892/or.2011.1473.
40. Giaginis, C.; Giagini, A.; Tsurouflis, G.; Gatzidou, E.; Agapitos, E.; Kouraklis, G.; Theocharis, S. MCM-2 and MCM-5 expression in gastric adenocarcinoma: clinical significance and comparison with Ki-67 proliferative marker. *Dig Dis Sci* **2011**, *56*, 777-785, doi:10.1007/s10620-010-1348-5.
41. Liu, M.; Li, J.S.; Tian, D.P.; Huang, B.; Rosqvist, S.; Su, M. MCM2 expression levels predict diagnosis and prognosis in gastric cardiac cancer. *Histol Histopathol* **2013**, *28*, 481-492, doi:10.14670/hh-28.481.
42. Tokuyasu, N.; Shomori, K.; Nishihara, K.; Kawaguchi, H.; Fujioka, S.; Yamaga, K.; Ikeguchi, M.; Ito, H. Minichromosome maintenance 2 (MCM2) immunoreactivity in stage III human gastric carcinoma: clinicopathological significance. *Gastric Cancer* **2008**, *11*, 37-46, doi:10.1007/s10120-008-0451-1.
43. Tang, Z.; Yang, Y.; Chen, W.; Li, E.; Liang, T. Demethylation at enhancer upregulates MCM2 and NUP37 expression predicting poor survival in hepatocellular carcinoma patients. *J Transl Med* **2022**, *20*, 49, doi:10.1186/s12967-022-03249-2.
44. Ahmed, M.Y.; Salah, M.M.; Kassim, S.K.; Abdelaal, A.; Elayat, W.M.; Mohamed, D.A.; Fouly, A.E.; Abu-Zahra, F.A.E. Evaluation of the diagnostic and therapeutic roles of non-coding RNA and cell proliferation related gene association in hepatocellular carcinoma. *Gene* **2019**, *706*, 97-105, doi:10.1016/j.gene.2019.04.054.
45. Queiroz, C.J.S.; Song, F.; Reed, K.R.; Al-Khafaji, N.; Clarke, A.R.; Vimalachandran, D.; Miyajima, F.; Pritchard, D.M.; Jenkins, J.R. NAP1L1: A Novel Human Colorectal Cancer Biomarker Derived From Animal Models of Apc Inactivation. *Front Oncol* **2020**, *10*, 1565, doi:10.3389/fonc.2020.01565.
46. Aydin, M.A.; Gul, G.; Kiziltan, R.; Algul, S.; Kemik, O. Nucleosome assembly protein 1-like 1 (NAP1L1) in colon cancer patients: a potential biomarker with diagnostic and prognostic utility. *Eur Rev Med Pharmacol Sci* **2020**, *24*, 10512-10517, doi:10.26355/eurrev\_202010\_23403.
47. Huang, Y.; Xiang, B.; Liu, Y.; Wang, Y.; Kan, H. LncRNA CDKN2B-AS1 promotes tumor growth and metastasis of human hepatocellular carcinoma by targeting let-7c-5p/NAP1L1 axis. *Cancer Lett* **2018**, *437*, 56-66, doi:10.1016/j.canlet.2018.08.024.
48. Chen, Z.; Gao, W.; Pu, L.; Zhang, L.; Han, G.; Zuo, X.; Zhang, Y.; Li, X.; Shen, H.; Wu, J.; et al. PRDM8 exhibits antitumor activities toward hepatocellular carcinoma by targeting NAP1L1. *Hepatology* **2018**, *68*, 994-1009, doi:10.1002/hep.29890.
49. Zhang, Y.W.; Chen, Q.; Li, B.; Li, H.Y.; Zhao, X.K.; Xiao, Y.Y.; Liu, S.; Zuo, S. NAP1L1 Functions as a Tumor Promoter via Recruiting Hepatoma-Derived Growth Factor/c-Jun Signal in Hepatocellular Carcinoma. *Front Cell Dev Biol* **2021**, *9*, 659680, doi:10.3389/fcell.2021.659680.
50. Le, Y.; Kan, A.; Li, Q.J.; He, M.K.; Chen, H.L.; Shi, M. NAP1L1 is a prognostic biomarker and contribute to doxorubicin chemotherapy resistance in human hepatocellular carcinoma. *Cancer Cell Int* **2019**, *19*, 228, doi:10.1186/s12935-019-0949-0.
51. Schimmack, S.; Taylor, A.; Lawrence, B.; Alaimo, D.; Schmitz-Winnenthal, H.; Büchler, M.W.; Modlin, I.M.; Kidd, M. A mechanistic role for the chromatin modulator, NAP1L1, in pancreatic neuroendocrine neoplasm proliferation and metastases. *Epigenetics Chromatin* **2014**, *7*, 15, doi:10.1186/1756-8935-7-15.
52. Wang, D.; Li, Y.; Liu, Y.; Cheng, S.; Liu, F.; Zuo, R.; Ding, C.; Shi, S.; Liu, G. NPM1 promotes cell proliferation by targeting PRDX6 in colorectal cancer. *Int J Biochem Cell Biol* **2022**, *147*, 106233, doi:10.1016/j.biocel.2022.106233.
53. Wong, J.C.; Hasan, M.R.; Rahman, M.; Yu, A.C.; Chan, S.K.; Schaeffer, D.F.; Kennecke, H.F.; Lim, H.J.; Owen, D.; Tai, I.T. Nucleophosmin 1, upregulated in adenomas and cancers of the colon, inhibits p53-mediated cellular senescence. *Int J Cancer* **2013**, *133*, 1567-1577, doi:10.1002/ijc.28180.
54. Yu, A.C.Y.; Chern, Y.J.; Zhang, P.; Pasiliao, C.C.; Rahman, M.; Chang, G.; Ren, J.; Tai, I.T. Inhibition of

- nucleophosmin 1 suppresses colorectal cancer tumor growth of patient -derived xenografts via activation of p53 and inhibition of AKT. *Cancer Biol Ther* **2021**, *22*, 112-123, doi:10.1080/15384047.2020.1839278.
55. Grbčić, P.; Fučkar Čupić, D.; Gamberi, T.; Kraljević Pavelić, S.; Sedić, M. Proteomic Profiling of BRAFV600E Mutant Colon Cancer Cells Reveals the Involvement of Nucleophosmin/c-Myc Axis in Modulating the Response and Resistance to BRAF Inhibition by Vemurafenib. *Int J Mol Sci* **2021**, *22*, doi:10.3390/ijms22126174.
  56. Liu, Y.; Zhang, F.; Zhang, X.F.; Qi, L.S.; Yang, L.; Guo, H.; Zhang, N. Expression of nucleophosmin/NPM1 correlates with migration and invasiveness of colon cancer cells. *J Biomed Sci* **2012**, *19*, 53, doi:10.1186/1423-0127-19-53.
  57. Nozawa, Y.; Van Belzen, N.; Van der Made, A.C.; Dinjens, W.N.; Bosman, F.T. Expression of nucleophosmin/B23 in normal and neoplastic colorectal mucosa. *J Pathol* **1996**, *178*, 48-52, doi:10.1002/(sici)1096-9896(199601)178:1<48::Aid-path432>3.0.Co;2-y.
  58. Yang, Y.F.; Zhang, X.Y.; Yang, M.; He, Z.H.; Peng, N.F.; Xie, S.R.; Xie, Y.F. Prognostic role of nucleophosmin in colorectal carcinomas. *Asian Pac J Cancer Prev* **2014**, *15*, 2021-2026, doi:10.7314/apjcp.2014.15.5.2021.
  59. Tang, J.; Chen, H.; Wong, C.C.; Liu, D.; Li, T.; Wang, X.; Ji, J.; Sung, J.J.; Fang, J.Y.; Yu, J. DEAD-box helicase 27 promotes colorectal cancer growth and metastasis and predicts poor survival in CRC patients. *Oncogene* **2018**, *37*, 3006-3021, doi:10.1038/s41388-018-0196-1.
  60. Liu, Y.; Li, C.; Fang, L.; Wang, L.; Liu, H.; Tian, H.; Zheng, Y.; Fan, T.; He, J. Lipid metabolism-related lncRNA SLC25A21-AS1 promotes the progression of oesophageal squamous cell carcinoma by regulating the NPM1/c-Myc axis and SLC25A21 expression. *Clin Transl Med* **2022**, *12*, e944, doi:10.1002/ctm2.944.
  61. Leal, M.F.; Mazzotti, T.K.F.; Calcagno, D.Q.; Cirilo, P.D.R.; Martinez, M.C.; Demachki, S.; Assumpcao, P.P.; Chammas, R.; Burbano, R.R.; Smith, M.C. Deregulated expression of Nucleophosmin 1 in gastric cancer and its clinicopathological implications. *BMC Gastroenterology* **2014**, *14*(1) (no pagination), doi:https://dx.doi.org/10.1186/1471-230X-14-9.
  62. Zhou, F.; Chen, E.; You, D.; Song, Y.; Sun, Z.; Yue, L. Both high expression of nucleophosmin/B23 and CRM1 predicts poorer prognosis in human gastric cancer. *Apmis* **2016**, *124*, 1046-1053, doi:10.1111/apm.12604.
  63. Zhou, F.; Qiu, W.; Sun, L.; Xiang, J.; Sun, X.; Sui, A.; Ding, A.; Yue, L. Clinical significance of nucleophosmin/B23 and human epidermal growth factor receptor 2/neu expressions in gastric cancers. *Apmis* **2013**, *121*, 582-591, doi:10.1111/apm.12043.
  64. Guo, C.A.; Su, X.L.; Wang, W.J.; Xia, T.H.; Cao, X.M.; Yuan, S.B.; Wang, W.A.; Zhang, A.; Liu, H.B. NPM1 is a diagnostic and prognostic biomarker associated with the clinicopathological characteristics of gastric cancer. *Neoplasma* **2022**, *20*, 965-975, doi:https://dx.doi.org/10.4149/neo\_2022\_220303N237.
  65. Li, Y.; Sun, Z.; Liu, K.; Qiu, W.; Yao, R.; Feng, T.; Xin, C.; Yue, L. Prognostic significance of the co-expression of nucleophosmin and trefoil factor 3 in postoperative gastric cancer patients. *Molecular and Clinical Oncology* **2014**, *2*, 1055-1061, doi:https://dx.doi.org/10.3892/mco.2014.351.
  66. Lakshmi Ch, N.P.; Sivagnanam, A.; Raja, S.; Mahalingam, S. Molecular basis for RASSF10/NPM/RNF2 feedback cascade-mediated regulation of gastric cancer cell proliferation. *J Biol Chem* **2021**, *297*, 100935, doi:10.1016/j.jbc.2021.100935.
  67. Yun, J.P.; Miao, J.; Chen, G.G.; Tian, Q.H.; Zhang, C.Q.; Xiang, J.; Fu, J.; Lai, P.B.S. Increased expression of nucleophosmin/B23 in hepatocellular carcinoma and correlation with clinicopathological parameters. *British Journal of Cancer* **2007**, *96*(3), 477-484, doi:https://dx.doi.org/10.1038/sj.bjc.6603574.
  68. Xu, D.H.; Liu, F.; Li, X.; Chen, X.F.; Jing, G.J.; Wu, F.Y.; Shi, S.L.; Li, Q.F. Regulatory role of nucleophosmin during the differentiation of human liver cancer cells. *Int J Oncol* **2014**, *45*, 264-272, doi:10.3892/ijo.2014.2407.

69. Lo, S.J.; Fan, L.C.; Tsai, Y.F.; Lin, K.Y.; Huang, H.L.; Wang, T.H.; Liu, H.; Chen, T.C.; Huang, S.F.; Chang, C.J.; et al. A novel interaction of nucleophosmin with BCL2-associated X protein regulating death evasion and drug sensitivity in human hepatoma cells. *Hepatology* **2013**, *57*(5), 1893–1905, doi:<https://dx.doi.org/10.1002/hep.26209>.
70. Zhang, D.; Wu, F.; Song, J.; Meng, M.; Fan, X.; Lu, C.; Weng, Q.; Fang, S.; Zheng, L.; Tang, B.; et al. A role for the NPM1/PTPN14/YAP axis in mediating hypoxia-induced chemoresistance to sorafenib in hepatocellular carcinoma. *Cancer Cell Int* **2022**, *22*, 65, doi:[10.1186/s12935-022-02479-0](https://doi.org/10.1186/s12935-022-02479-0).
71. Liu, D.; Qian, D.; Dai, J.; An, Y.; Jiang, S.; Stanley, B.; Yang, J.; Wang, B.; Liu, X.; Liu, D.X. Nucleophosmin (NPM1/B23) interacts with activating transcription factor 5 (ATF5) protein and promotes proteasome- and caspase-dependent ATF5 degradation in hepatocellular carcinoma cells. *Journal of Biological Chemistry* **2012**, *287*(23), 19599–19609, doi:<https://dx.doi.org/10.1074/jbc.M112.363622>.
72. Li, X.; Xu, D.H.; Liu, F.; Liu, G.Y.; Lu, K.; Deng, X.L.; Li, Q.F.; Shi, S.L. Relocation of NPM Affects the Malignant Phenotypes of Hepatoma SMMC-7721 Cells. *J Cell Biochem* **2017**, *118*, 3225–3236, doi:[10.1002/jcb.25971](https://doi.org/10.1002/jcb.25971).
73. Ching, R.H.H.; Lau, E.Y.T.; Ling, P.M.T.; Lee, J.M.F.; Ma, M.K.F.; Cheng, B.Y.L.; Lo, R.C.L.; Ng, I.O.L.; Lee, T.K.W. Phosphorylation of Nucleophosmin at Threonine 234/237 is associated with HCC metastasis. *Oncotarget* **2015**, *6*, 43483–43495, doi:<https://dx.doi.org/10.18632/oncotarget.5820>.
74. Zhu, Y.; Shi, M.; Chen, H.; Gu, J.; Zhang, J.; Shen, B.; Deng, X.; Xie, J.; Zhan, X.; Peng, C. NPM1 activates metabolic changes by inhibiting FBP1 while promoting the tumorigenicity of pancreatic cancer cells. *Oncotarget* **2015**, *6*, 21443–21451, doi:[10.18632/oncotarget.4167](https://doi.org/10.18632/oncotarget.4167).
75. Hamilton, G.; Abraham, A.G.; Morton, J.; Sampson, O.; Pefani, D.E.; Khoronenkova, S.; Grawenda, A.; Papaspyropoulos, A.; Jamieson, N.; McKay, C.; et al. AKT regulates NPM dependent ARF localization and p53mut stability in tumors. *Oncotarget* **2014**, *5*, 6142–6167, doi:[10.18632/oncotarget.2178](https://doi.org/10.18632/oncotarget.2178).
76. Wu, D.M.; Zhang, P.; Liu, R.Y.; Sang, Y.X.; Zhou, C.; Xu, G.C.; Yang, J.L.; Tong, A.P.; Wang, C.T. Phosphorylation and changes in the distribution of nucleolin promote tumor metastasis via the PI3K/Akt pathway in colorectal carcinoma. *FEBS Lett* **2014**, *588*, 1921–1929, doi:[10.1016/j.febslet.2014.03.047](https://doi.org/10.1016/j.febslet.2014.03.047).
77. Reyes-Reyes, E.M.; Akiyama, S.K. Cell-surface nucleolin is a signal transducing P-selectin binding protein for human colon carcinoma cells. *Exp Cell Res* **2008**, *314*, 2212–2223, doi:[10.1016/j.yexcr.2008.03.016](https://doi.org/10.1016/j.yexcr.2008.03.016).
78. Wu, R.; Li, L.; Bai, Y.; Yu, B.; Xie, C.; Wu, H.; Zhang, Y.; Huang, L.; Yan, Y.; Li, X.; et al. The long noncoding RNA LUCAT1 promotes colorectal cancer cell proliferation by antagonizing Nucleolin to regulate MYC expression. *Cell Death Dis* **2020**, *11*, 908, doi:[10.1038/s41419-020-03095-4](https://doi.org/10.1038/s41419-020-03095-4).
79. Qi, J.; Li, H.; Liu, N.; Xing, Y.; Zhou, G.; Wu, Y.; Liu, Y.; Chen, W.; Yue, J.; Han, B.; et al. The implications and mechanisms of the extra-nuclear nucleolin in the esophageal squamous cell carcinomas. *Med Oncol* **2015**, *32*, 45, doi:[10.1007/s12032-015-0484-3](https://doi.org/10.1007/s12032-015-0484-3).
80. Qiu, W.; Zhou, F.; Zhang, Q.; Sun, X.; Shi, X.; Liang, Y.; Wang, X.; Yue, L. Overexpression of nucleolin and different expression sites both related to the prognosis of gastric cancer. *Apmis* **2013**, *121*, 919–925, doi:[10.1111/apm.12131](https://doi.org/10.1111/apm.12131).
81. Devanand, P.; Oya, Y.; Sundaramoorthy, S.; Song, K.Y.; Watanabe, T.; Kobayashi, Y.; Shimizu, Y.; Hong, S.A.; Sukanuma, M.; Lim, I.K. Inhibition of TNF $\alpha$ -interacting protein  $\alpha$  (Tip $\alpha$ )-associated gastric carcinogenesis by BTG2/(TIS21) via downregulating cytoplasmic nucleolin expression. *Exp Mol Med* **2018**, *50*, e449, doi:[10.1038/emmm.2017.281](https://doi.org/10.1038/emmm.2017.281).
82. Qiu, W.; Wang, G.; Sun, X.; Ye, J.; Wei, F.; Shi, X.; Lv, G. The involvement of cell surface nucleolin in the initiation of CCR6 signaling in human hepatocellular carcinoma. *Med Oncol* **2015**, *32*, 75, doi:[10.1007/s12032-015-0530-1](https://doi.org/10.1007/s12032-015-0530-1).
83. Guo, X.; Yu, L.; Dong, J.; Li, R.; Li, B.; Liu, H.; Yang, M.; Zhao, J. Increased level of nucleolin confers to aggressive

- tumor progression and poor prognosis in patients with hepatocellular carcinoma after hepatectomy. *Hepatology* **2014**, *1*, 856A, doi:<https://dx.doi.org/10.1002/hep.27524>.
84. Chen, S.C.; Hu, T.H.; Huang, C.C.; Kung, M.L.; Chu, T.H.; Yi, L.N.; Huang, S.T.; Chan, H.H.; Chuang, J.H.; Liu, L.F.; et al. Hepatoma-derived growth factor/nucleolin axis as a novel oncogenic pathway in liver carcinogenesis. *Oncotarget* **2015**, *6*, 16253–16270, doi:10.18632/oncotarget.3608.
  85. Burbano De Lara, S.; Tran, D.D.H.; Allister, A.B.; Polenkowski, M.; Nashan, B.; Koch, M.; Tamura, T. C20orf204, a hepatocellular carcinoma-specific protein interacts with nucleolin and promotes cell proliferation. *Oncogenesis* **2021**, *10*, 31, doi:<https://dx.doi.org/10.1038/s41389-021-00320-3>.
  86. Gilles, M.E.; Maione, F.; Cossutta, M.; Carpentier, G.; Caruana, L.; Di Maria, S.; Houppé, C.; Destouches, D.; Shchors, K.; Prochasson, C.; et al. Nucleolin Targeting Impairs the Progression of Pancreatic Cancer and Promotes the Normalization of Tumor Vasculature. *Cancer Res* **2016**, *76*, 7181–7193, doi:10.1158/0008-5472.Can-16-0300.
  87. Peng, L.; Liang, J.; Wang, H.; Song, X.; Rashid, A.; Gomez, H.F.; Corley, L.J.; Abbruzzese, J.L.; Fleming, J.B.; Evans, D.B.; et al. High levels of nucleolar expression of nucleolin are associated with better prognosis in patients with stage II pancreatic ductal adenocarcinoma. *Clin Cancer Res* **2010**, *16*, 3734–3742, doi:10.1158/1078-0432.Ccr-09-3411.
  88. Xu, C.; Wang, Y.; Tu, Q.; Zhang, Z.; Chen, M.; Mwangi, J.; Li, Y.; Jin, Y.; Zhao, X.; Lai, R. Targeting surface nucleolin induces autophagy-dependent cell death in pancreatic cancer via AMPK activation. *Oncogene* **2019**, *38*, 1832–1844, doi:10.1038/s41388-018-0556-x.
  89. Jin, X.; Jiang, R.; Xiang, Y.; Fan, Z.; Wu, Z.; Yang, B.; Yang, L.; Wei, S.; Yang, Y. Overexpression of retinoblastoma-binding protein 4 contributes to the radiosensitivity of AGS gastric cancer cells via phosphoinositide3-kinase/protein kinase B pathway suppression. *Mol Med Rep* **2018**, *18*, 1571–1581, doi:10.3892/mmr.2018.9153.
  90. Yu, B.; Chen, X.; Li, J.; Gu, Q.; Zhu, Z.; Li, C.; Su, L.; Liu, B. microRNA-29c inhibits cell proliferation by targeting NASP in human gastric cancer. *BMC Cancer* **2017**, *17*, 109, doi:10.1186/s12885-017-3096-9.
  91. Kang, X.; Feng, Y.; Gan, Z.; Zeng, S.; Guo, X.; Chen, X.; Zhang, Y.; Wang, C.; Liu, K.; Chen, X.; et al. NASP antagonize chromatin accessibility through maintaining histone H3K9me1 in hepatocellular carcinoma. *Biochim Biophys Acta Mol Basis Dis* **2018**, *1864*, 3438–3448, doi:10.1016/j.bbadis.2018.07.033.
  92. Yin, L.; Tang, Y.; Xiao, M.; Li, M.; Huang, F.; Wang, Y.L. The role of histone chaperone spt2d1 in human colorectal cancer. *Mol Cell Probes* **2022**, *64*, 101832, doi:10.1016/j.mcp.2022.101832.
  93. Diao, C.; Guo, P.; Yang, W.; Sun, Y.; Liao, Y.; Yan, Y.; Zhao, A.; Cai, X.; Hao, J.; Hu, S.; et al. SPT6 recruits SND1 to co-activate human telomerase reverse transcriptase to promote colon cancer progression. *Mol Oncol* **2021**, *15*, 1180–1202, doi:10.1002/1878-0261.12878.
  94. Shen, J.; Chen, M.; Lee, D.; Law, C.T.; Wei, L.; Tsang, F.H.C.; Chin, D.W.C.; Cheng, C.L.H.; Lee, J.M.F.; Ng, I.O.L.; et al. Histone chaperone FACT complex mediates oxidative stress response to promote liver cancer progression. *Gut* **2020**, *69*(2), 329–342, doi:<https://dx.doi.org/10.1136/gutjnl-2019-318668>.
  95. Song, H.; Zeng, J.; Roychoudhury, S.; Biswas, P.; Mohapatra, B.; Ray, S.; Dowlathshahi, K.; Wang, J.; Band, V.; Talmon, G.; et al. Targeting Histone Chaperone FACT Complex Overcomes 5-Fluorouracil Resistance in Colon Cancer. *Mol Cancer Ther* **2020**, *19*, 258–269, doi:10.1158/1535-7163.Mct-19-0600.
  96. Wu, W.; He, K.; Guo, Q.; Chen, J.; Zhang, M.; Huang, K.; Yang, D.; Wu, L.; Deng, Y.; Luo, X.; et al. SSRP1 promotes colorectal cancer progression and is negatively regulated by miR-28-5p. *J Cell Mol Med* **2019**, *23*, 3118–3129, doi:10.1111/jcmm.14134.

97. Wang, Q.; Jia, S.; Jiao, Y.; Xu, L.; Wang, D.; Chen, X.; Hu, X.; Liang, H.; Wen, N.; Zhang, S.; et al. SSRP1 influences colorectal cancer cell growth and apoptosis via the AKT pathway. *Int J Med Sci* **2019**, *16*, 1573–1582, doi:10.7150/ijms.38439.
98. Huang, H.; Cai, L.; Li, R.; Ye, L.; Chen, Z. A novel lncRNA LOC101927746 accelerates progression of colorectal cancer via inhibiting miR-584-3p and activating SSRP1. *Biochem Biophys Res Commun* **2019**, *509*, 734–738, doi:10.1016/j.bbrc.2018.12.174.
99. Jin, G.; Zhao, R.; Zhang, J.; Cao, T.; Tang, T. SSRP1 affects the growth and apoptosis of gastric cancer cells through AKT pathway. *J Med Biochem* **2022**, *41*, 100–107, doi:10.5937/jomb0-33374.
100. Ding, Q.; He, K.; Luo, T.; Deng, Y.; Wang, H.; Liu, H.; Zhang, J.; Chen, K.; Xiao, J.; Duan, X.; et al. SSRP1 Contributes to the Malignancy of Hepatocellular Carcinoma and Is Negatively Regulated by miR-497. *Mol Ther* **2016**, *24*, 903–914, doi:10.1038/mt.2016.9.
101. Min, J.; Jin, D.; Zhang, F.; Kang, Y.; Qi, Y.; Du, P. DLG1-AS1 is activated by MYC and drives the proliferation and migration of hepatocellular carcinoma cells through miR-497-5p/SSRP1 axis. *Cancer Cell International* **2021**, *21*, 16, doi:https://dx.doi.org/10.1186/s12935-020-01667-0.
102. Zheng, S.; Guo, Y.; Dai, L.; Liang, Z.; Yang, Q.; Yi, S. Long intergenic noncoding RNA01134 accelerates hepatocellular carcinoma progression by sponging microRNA-4784 and downregulating structure specific recognition protein 1. *Bioengineered* **2020**, *11*, 1016–1026, doi:10.1080/21655979.2020.1818508.
103. Wang, P.; Yang, X.; Zhao, L.; Liu, D.; Liu, J.; Ding, Y. A novel long non-coding RNA TONSL-AS1 regulates progression of gastric cancer via activating TONSL. *Exp Cell Res* **2019**, *382*, 111453, doi:10.1016/j.yexcr.2019.05.034.
104. Chen, T.; Tu, Y.; Lv, D.; Lin, K.; Tang, H.; Huang, W. Vacuolar protein sorting-associated protein 72 homolog (VPS72) binding to lysine acetyltransferase 5 (KAT5) promotes the proliferation, invasion and migration of hepatocellular carcinoma through regulating phosphatidylinositol 3-kinase (PI3K)/protein kinase B (AKT) signaling pathway. *Bioengineered* **2022**, *13*, 9197–9210, doi:10.1080/21655979.2022.2056692.
105. Shen, J.; Chen, M.; Lee, D.; Law, C.T.; Wei, L.; Tsang, F.H.; Chin, D.W.; Cheng, C.L.; Lee, J.M.; Ng, I.O.; et al. Histone chaperone FACT complex mediates oxidative stress response to promote liver cancer progression. *Gut* **2020**, *69*, 329–342, doi:10.1136/gutjnl-2019-318668.
106. Chen, T.; Zhou, L.; Zhou, Y.; Zhou, W.; Huang, H.; Yin, S.; Xie, H.; Zhou, L.; Zheng, S. HJURP Promotes Epithelial-to-Mesenchymal Transition via Upregulating SPHK1 in Hepatocellular Carcinoma. *Int J Biol Sci* **2019**, *15*, 1139–1147, doi:10.7150/ijbs.30904.
107. Li, Y.; Yi, Q.; Liao, X.; Han, C.; Zheng, L.; Li, H.; Yu, Q.; Yan, X.; Chen, X.; Zhu, H.; et al. Hypomethylation-driven overexpression of HJURP promotes progression of hepatocellular carcinoma and is associated with poor prognosis. *Biochem Biophys Res Commun* **2021**, *566*, 67–74, doi:10.1016/j.bbrc.2021.05.102.
108. Yun, J.P.; Miao, J.; Chen, G.G.; Tian, Q.H.; Zhang, C.Q.; Xiang, J.; Fu, J.; Lai, P.B. Increased expression of nucleophosmin/B23 in hepatocellular carcinoma and correlation with clinicopathological parameters. *Br J Cancer* **2007**, *96*, 477–484, doi:10.1038/sj.bjc.6603574.
109. Lo, S.J.; Fan, L.C.; Tsai, Y.F.; Lin, K.Y.; Huang, H.L.; Wang, T.H.; Liu, H.; Chen, T.C.; Huang, S.F.; Chang, C.J.; et al. A novel interaction of nucleophosmin with BCL2-associated X protein regulating death evasion and drug sensitivity in human hepatoma cells. *Hepatology* **2013**, *57*, 1893–1905, doi:10.1002/hep.26209.
110. Leal, M.F.; Mazzotti, T.K.; Calcagno, D.Q.; Cirilo, P.D.; Martinez, M.C.; Demachki, S.; Assumpção, P.P.; Chammas, R.; Burbano, R.R.; Smith, M.C. Deregulated expression of Nucleophosmin 1 in gastric cancer and its clinicopathological implications. *BMC Gastroenterol* **2014**, *14*, 9, doi:10.1186/1471-230x-14-9.

- 
111. Guo, X.; Xiong, L.; Yu, L.; Li, R.; Wang, Z.; Ren, B.; Dong, J.; Li, B.; Wang, D. Increased level of nucleolin confers to aggressive tumor progression and poor prognosis in patients with hepatocellular carcinoma after hepatectomy. *Diagn Pathol* **2014**, *9*, 175, doi:10.1186/s13000-014-0175-y.
